# Supplementary material
Source: HighWire-hosted journal article supplement (https://jitc.bmj.com/content/8/2/e000980)

Supplementary Figure 2. Patients with pulmonary atypical carcinoid tumors

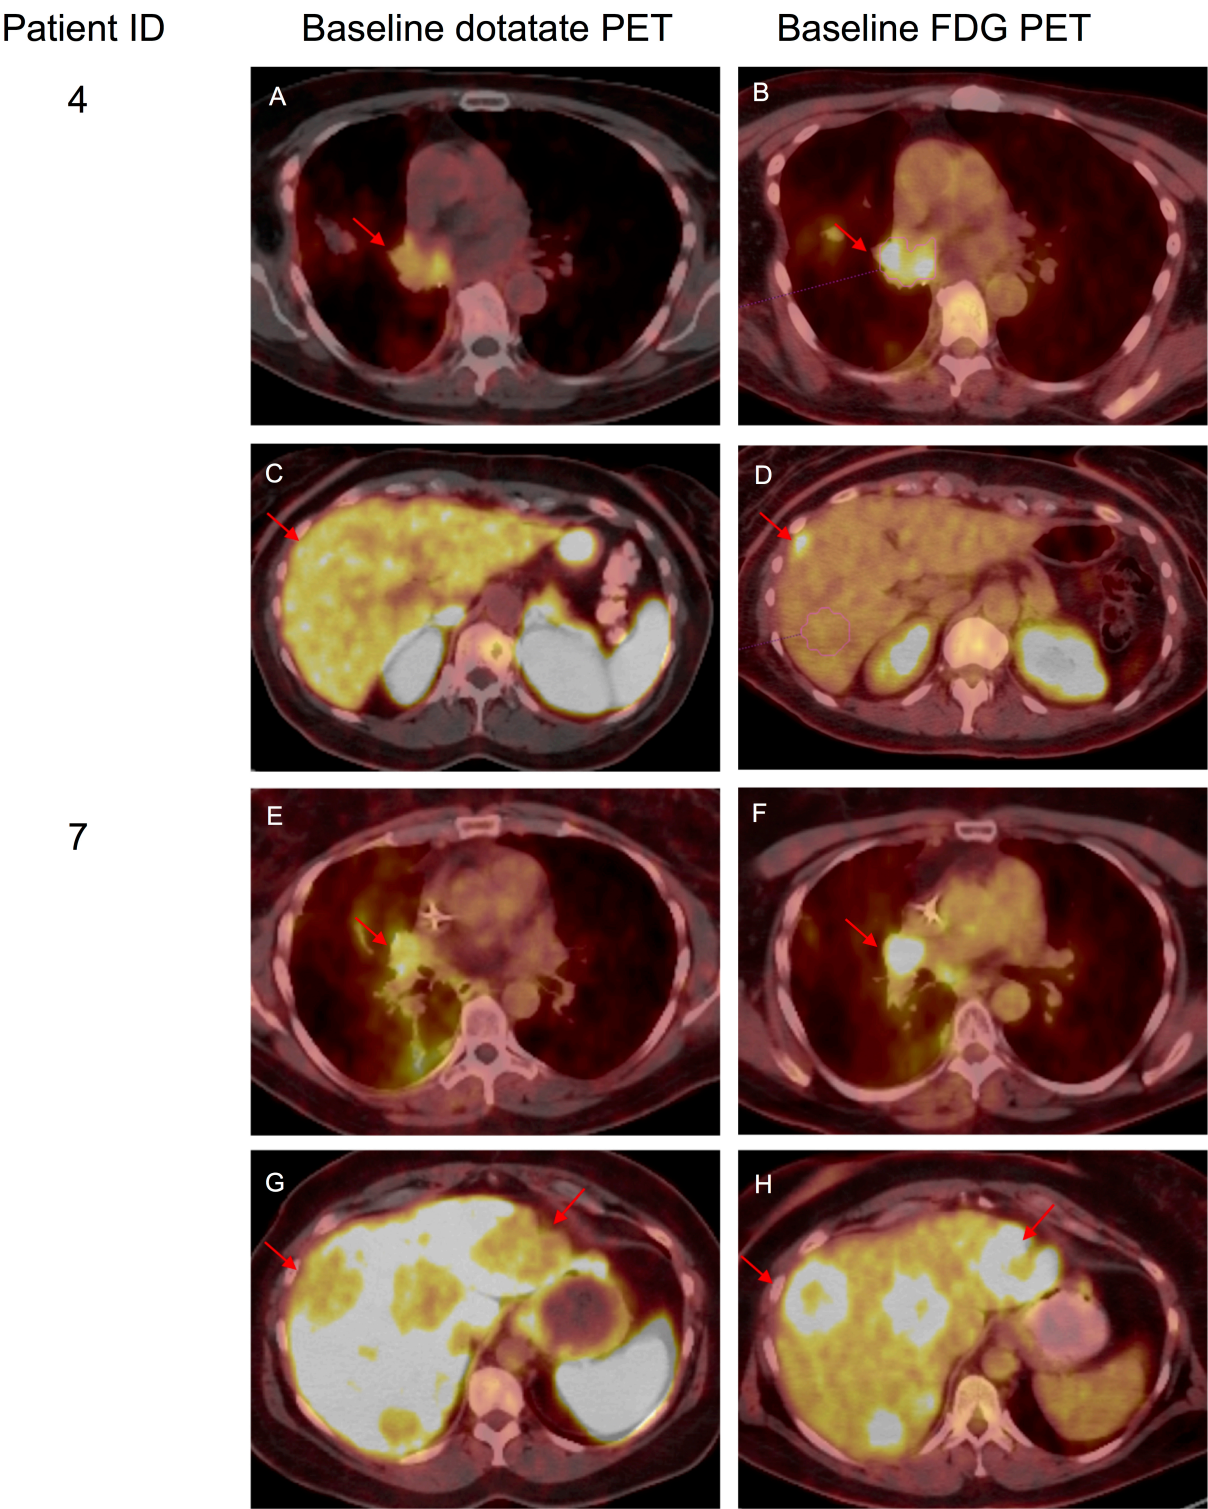

Supplement: inline-supplementary-material-2 [file inline-supplementary-material-2.pdf]
